# Supplementary material for: Analysis of small nucleolar RNAs reveals unique genetic features in malaria parasites
Source: PubMed Central journal article supplement (PMC2656528; doi:10.1186/1471-2164-10-68), 2009-02-07
Supplement: 1471-2164-10-68-S1.pdf [file 1471-2164-10-68-S1.pdf]

**Ribosomal proteins:**

| <b>Large subunit</b> | <b>Plasmodb Acc No.</b>            | <b>Small subunit</b> | <b>Plasmodb Acc No.</b> |
|----------------------|------------------------------------|----------------------|-------------------------|
| L3                   | <u>PF10_0272</u>                   | SA                   | <u>PF10_0264</u>        |
| L4                   | <u>PFE0350c</u>                    | S2                   | <u>PF14_0448</u>        |
| L5                   | <u>PF14_0230</u>                   | S3                   | <u>PF14_0627</u>        |
| L6                   | <u>PF13_0213</u>                   | S3A                  | <u>PFC1020c</u>         |
| L7                   | <u>PFC0300c</u>                    | S4                   | <u>PF11_0065</u>        |
| L7A                  | <u>PF14_0231</u>                   | S5                   | <u>PF07_0088</u>        |
| L8                   | <u>PFE0845c</u>                    | S6                   | <u>PF13_0228</u>        |
| L9                   | <u>PF13_0129</u>                   | S7                   | <u>PF13_0014</u>        |
| L10                  | <u>PF14_0141</u>                   | S8                   | <u>PF14_0083</u>        |
| L10A                 | <u>PF14_0391</u>                   | S9                   | <u>PFE1005w</u>         |
| L11                  | <u>PF07_0079</u>                   | S10                  | <u>PF07_0080</u>        |
| L12                  | <u>PFE0850c</u>                    | S11                  | <u>PFC0775w</u>         |
| L13                  | <u>PF08_0075</u>                   | S12                  | <u>PFC0295c</u>         |
| L13A                 | <u>PF10_0043</u>                   | S13                  | <u>PF13_0316</u>        |
| L14                  | <u>PF14_0296</u>                   | S14                  | <u>PFE0810c</u>         |
| L15                  | <u>PFD0770c</u>                    | S15                  | <u>MAL13P1.92</u>       |
| L17                  | <u>PF13_0268</u>                   | S15A                 | <u>PFC0735w</u>         |
| L18                  | <u>MAL13P1.209</u>                 | S16                  | <u>PF08_0076</u>        |
| L18A                 | <u>PF13_0224</u>                   | S17                  | <u>PFL2055w</u>         |
| L19                  | <u>PFF0700c</u>                    | S18                  | <u>PF11_0272</u>        |
| L21                  | <u>PF14_0240</u>                   | S19                  | <u>PFD1055w</u>         |
| L22                  | <u>PF08_0039</u>                   | S20                  | <u>PF10_0038</u>        |
| L23                  | <u>PF13_0171</u>                   | S21                  | <u>PF11_0454</u>        |
| L23A                 | <u>PF13_0132</u>                   | S23                  | <u>PFC0290w</u>         |
| L24                  | <u>PF13_0049</u> , <u>PFE0300c</u> | S24                  | <u>PFE0975c</u>         |
| L26                  | <u>PFC0535w</u>                    | S25                  | <u>PF14_0205</u>        |
| L27                  | <u>PF14_0579</u>                   | S26                  | <u>PFB0830w</u>         |
| L27A                 | <u>PFF0885w</u>                    | S27                  | <u>PF13_0045</u>        |
| L28                  | <u>PF11_0437</u>                   | S27A                 | <u>PF14_0027</u>        |
| L29                  | No Match                           | S28                  | <u>PF14_0585</u>        |
| L30                  | <u>PF10_0187</u>                   | S29                  | <u>MAL7P1.300</u>       |
| L31                  | <u>PFE0185c</u>                    | S30                  | <u>PFB0885w</u>         |
| L32                  | <u>PFI0190w</u>                    |                      |                         |
| L34                  | <u>PF07_0043</u>                   |                      |                         |
| L35                  | <u>PF11_0260</u>                   |                      |                         |
| L35A                 | <u>PF11_0438</u>                   |                      |                         |
| L36                  | <u>PF11_0106</u>                   |                      |                         |
| L36A                 | <u>PFC0200w</u>                    |                      |                         |
| L37                  | <u>MAL7P1.320</u>                  |                      |                         |
| L37A                 | <u>PFB0455w</u>                    |                      |                         |
| L38                  | <u>PF11_0312</u>                   |                      |                         |
| L39                  | <u>PFF0573c</u>                    |                      |                         |

|     |                   |
|-----|-------------------|
| L40 | <u>PF13_0346</u>  |
| L41 | <u>PKH_094180</u> |
| LP0 | <u>PF11_0313</u>  |
| LP1 | <u>PF11_0043</u>  |
| LP2 | <u>PFC0400w</u>   |
| LP3 |                   |

### U3 snoRNP complex subunit

| Subunits     | PlasmoDB Acc No. | Description                                           |
|--------------|------------------|-------------------------------------------------------|
| <b>IMP3</b>  | <u>PF14_0584</u> | ribosomal protein<br>S4, putative                     |
| <b>IMP4</b>  | <u>PF08_0055</u> | u3 small<br>nucleolar<br>ribonucleoprotein<br>protein |
| <b>LCP5</b>  | <b>No match.</b> |                                                       |
| <b>MPP10</b> | <u>PF10_0266</u> | hypothetical<br>protein                               |
| <b>RRP9</b>  | <u>PFL1290w</u>  | U3 snoRNP<br>associated<br>protein, putative          |
| <b>SOF1</b>  | <u>PF0455w</u>   | ribosomal<br>processing<br>protein, putative          |

### RNA Helicases:

|              |                                        |                                                                         |
|--------------|----------------------------------------|-------------------------------------------------------------------------|
| <b>DBP3</b>  | <u>PFL1310c</u>                        | ATP-dependent RNA<br>helicase, putative                                 |
| <b>DBP4</b>  | <u>PFF1500c</u>                        | DEAD/DEAH box ATP-<br>dependent RNA helicase,<br>putative               |
| <b>DBP6</b>  | <u>PFB0860c</u>                        | RNA helicase, putative                                                  |
| <b>DBP7</b>  | <u>MAL7P1.113</u>                      | DEAD box helicase,<br>putative                                          |
| <b>DBP8</b>  | <u>PFB0860c</u>                        | RNA helicase, putative                                                  |
| <b>DBP9</b>  | <u>PFL2010c</u>                        | DEAD/DEAH box helicase,<br>putative                                     |
| <b>DBP10</b> | <u>MAL8P1.19</u>                       | RNA helicase, putative                                                  |
| <b>DHR1</b>  | <u>PF10_0294,</u><br><u>MAL13P1.14</u> | RNA helicase, putative;<br>ATP-dependent DEAD box<br>helicase, putative |
| <b>DHR2</b>  | <u>PF10_0294</u>                       | RNA helicase, putative                                                  |

|             |                                    |                                                                                        |
|-------------|------------------------------------|----------------------------------------------------------------------------------------|
| <b>DOB1</b> | <u>PPF0100w</u><br><u>PFI0480w</u> | putative ATP dependent<br>RNA helicase ; helicase<br>with Zn-finger motif,<br>putative |
| <b>MTR4</b> | <u>PPF0100w</u>                    | Putative ATP dependent<br>RNA helicase                                                 |
| <b>FAL1</b> | <u>PF14_0655</u>                   | RNA helicase-1, putative                                                               |
| <b>MAK5</b> | <u>PFE1390w</u>                    | RNA helicase-1, putative                                                               |
| <b>ROK1</b> | <u>PF10_0209</u>                   | RNA helicase, putative                                                                 |
| <b>RRP3</b> | <u>PFB0860c</u>                    | RNA helicase, putative                                                                 |
| <b>SPB4</b> | <u>PPF1500c</u>                    | DEAD/DEAH box ATP-<br>dependent RNA helicase,<br>putative                              |
| <b>SEN1</b> | <u>MAL13P1.13</u>                  | hypothetical protein,<br>conserved                                                     |
| <b>DRS1</b> | <u>PFL2475w</u>                    | DEAD/DEAH box helicase,<br>putative                                                    |

**Exosome: complex of 3'-5' exonuclease:**

|              |                    |                                                        |
|--------------|--------------------|--------------------------------------------------------|
| <b>RRP4</b>  | <u>PF0515w</u>     | exosome complex<br>exonuclease rrp4,<br>Putative       |
| <b>RRP42</b> | <u>MAL13P1.204</u> | exoribonuclease<br>PH, putative                        |
| <b>CSL4</b>  | <u>MAL7P1.104</u>  | 3'-5'<br>exoribonuclease<br>Csl4 homolog,<br>putative  |
| <b>RRP40</b> | <u>MAL13P1.36</u>  | hypothetical<br>protein, conserved                     |
| <b>RRP46</b> | <u>PF14_0256</u>   | exosome complex<br>exonuclease rrp41,<br>putative      |
| <b>RRP41</b> | <u>PF14_0256</u>   | exosome complex<br>exonuclease rrp41,<br>putative      |
| <b>RRP44</b> | <u>MAL13P1.289</u> | mitotic control<br>protein dis3<br>homologue, putative |
| <b>RRP43</b> | No match           |                                                        |
| <b>RRP45</b> | <u>PF13_0340</u>   | exosome complex<br>exonuclease,                        |

|             |                  |                                |
|-------------|------------------|--------------------------------|
| <b>MTR3</b> | No match         | putative;                      |
| <b>RRP6</b> | <u>PF14_0473</u> | 3'-5' exonuclease,<br>putative |

**5'-3' exonuclease:**

|             |                 |                           |
|-------------|-----------------|---------------------------|
| <b>RAT1</b> | <u>PF10455w</u> | exoribonuclease, putative |
| <b>XRN1</b> | <u>PF10455w</u> | exoribonuclease, putative |

**Nucleo-cytoplasmic Transport factor:**

|              |                  |                                                   |
|--------------|------------------|---------------------------------------------------|
| <b>NOP3</b>  | <u>PF10_0217</u> | pre-mRNA splicing<br>factor, putative             |
| <b>RNA1</b>  | No match.        |                                                   |
| <b>PRP20</b> | <u>PFE0420c</u>  | guanidine nucleotide<br>exchange factor, putative |
| <b>SRM1</b>  | <u>PFE0420c</u>  | guanidine nucleotide<br>exchange factor, putative |
| <b>SRP1</b>  | <u>PF08_0087</u> | importin alpha, putative                          |

**Nucleolar protein:**

|             |                  |                                            |
|-------------|------------------|--------------------------------------------|
| <b>DIM1</b> | <u>PF14_0156</u> | dimethyladenosine<br>transferase, putative |
| <b>NSR1</b> | <u>PF14_0194</u> | spliceosome-associated<br>protein          |
| <b>NOP2</b> | <u>PF11_0305</u> |                                            |
| <b>NOP4</b> | <u>PF10820c</u>  | RNA-binding protein,<br>putative           |
| <b>NOP8</b> | <u>PF11_0239</u> | protein kinase, FIKK<br>family             |

|              |                  |                                                             |
|--------------|------------------|-------------------------------------------------------------|
| <b>NPI46</b> | <u>PFL2275c</u>  | FK506-binding protein (FKBP)-type peptidyl-propyl isomerase |
| <b>RRP8</b>  | <u>PF11235w</u>  | methyltransferase, putative                                 |
| <b>RRP5</b>  | <u>PF14_0042</u> | U3 small nucleolar ribonucleoprotein, U3 snoRNP, putative   |

**Box H/ACA snoRNP complex:**

|              |                  |                                                     |
|--------------|------------------|-----------------------------------------------------|
| <b>NHP2</b>  | <u>PFD0960c</u>  | ribosomal protein L7Ae-related protein, putative    |
| <b>CBF5</b>  | <u>PF14_0174</u> | Small nucleolar ribonucleoprotein, snoRNP, putative |
| <b>GAR1</b>  | <u>PF13_0051</u> | snoRNP protein gar1 homologue, putative             |
| <b>NOP10</b> | <u>PF14_0784</u> | Ribosome biogenesis protein, NOP10-like             |

**Box C/D snoRNP complex:**

|              |                  |                                                 |
|--------------|------------------|-------------------------------------------------|
| <b>NOP1</b>  | <u>PF14_0068</u> | fibrillarin, putative                           |
| <b>SNU13</b> | <u>PF11_0250</u> | high mobility group-like protein NHP2, putative |
| <b>NOP56</b> | <u>PF11_0191</u> | nucleolar protein NOP56, putative               |
| <b>NOP58</b> | <u>PF10_0085</u> | nucleolar protein NOP5, putative                |

**RNase P/MRP complex subunits:**

|             |                  |                     |
|-------------|------------------|---------------------|
| <b>POP1</b> | <u>MAL7P1.28</u> | ribonucleases p/mrp |
|-------------|------------------|---------------------|

|             |                 |                           |
|-------------|-----------------|---------------------------|
| <b>POP3</b> | No match        | protein subunit, putative |
| <b>POP4</b> | <u>PFF1355w</u> | Hypothetical protein      |
| <b>POP5</b> | No match        |                           |
| <b>POP6</b> | No match        |                           |
| <b>POP7</b> | <u>PFB0735c</u> | Hypothetical protein      |
| <b>SNM1</b> | No match        |                           |
| <b>RMP1</b> | No match        |                           |
| <b>POP8</b> | No match        |                           |
| <b>RPP1</b> | <u>PFF1040w</u> | Hypothetical protein      |
