# Supplementary material for: Analysis of small nucleolar RNAs reveals unique genetic features in malaria parasites
Source: PubMed Central journal article supplement (PMC2656528; doi:10.1186/1471-2164-10-68), 2009-02-07
Supplement: 1471-2164-10-68-S2.pdf [file 1471-2164-10-68-S2.pdf]

**Additional file 2: Homologs of snoRNA in *Plasmodium* species**

| snoRNA | PC Ac no. | Start | End   | PY Ac no.  | Start | End   | PV Ac no. | Start   | End     |
|--------|-----------|-------|-------|------------|-------|-------|-----------|---------|---------|
| S1     | PC_RP1947 | 560   | 484   | MALPY01185 | 16    | 93    | ctg_7187  | 314148  | 314070  |
| S2     | PC_RP2105 | 10261 | 10178 | MALPY00145 | 12    | 98    | ctg_6950  | 235021  | 235098  |
| S3     | PC_RP4763 | 270   | 350   | N.A.       | N.A.  | N.A.  | ctg_6977  | 277923  | 277842  |
| S4     | N.A.      | N.A.  | N.A.  | N.A.       | N.A.  | N.A.  | ctg_6977  | 292625  | 292545  |
| S5     | PC_RP1727 | 2540  | 2473  | MALPY00191 | 4647  | 4582  | ctg_6977  | 288677  | 288611  |
| S6     | PC_RP1727 | 1097  | 1034  | MALPY00191 | 3090  | 3027  | ctg_6977  | 286891  | 286826  |
| S7     | PC_RP1727 | 1859  | 1776  | MALPY00191 | 3902  | 3818  | ctg_6977  | 287754  | 287674  |
| S8     | PC_RP4842 | 16    | 95    | MALPY02383 | 9609  | 9530  | ctg_6877  | 1056444 | 1056360 |
| S9     | PC_RP0299 | 677   | 761   | MALPY02194 | 8235  | 8313  | ctg_6877  | 1058943 | 1058874 |
| S9b    | PC_RP0299 | 725   | 793   | MALPY02194 | 8277  | 8345  | N.A.      | N.A.    | N.A.    |
| S10    | PC_RP1988 | 1126  | 1062  | MALPY02194 | 3506  | 3442  | ctg_6877  | 1064434 | 1064496 |
| S11    | PC_RP1988 | 363   | 291   | MALPY02194 | 2651  | 2579  | ctg_6877  | 1065169 | 1065246 |
| S12    | PC_RP1988 | 105   | 28    | MALPY02194 | 2386  | 2309  | ctg_6877  | 1065653 | 1065731 |
| S13    | PC_RP4842 | 634   | 709   | MALPY02383 | 9009  | 8934  | ctg_6877  | 1055723 | 1055648 |
| S14    | PC_RP2302 | 226   | 355   | MALPY01189 | 901   | 769   | ctg_6877  | 1161717 | 1161809 |
| S15    | N.A.      | N.A.  | N.A.  | MALPY00036 | 23046 | 22972 | ctg_6877  | 1993544 | 1993622 |
| S16    | N.S       | N.S   | N.S   | N.S        | N.S.  | N.S   | N.S       | N.S     | N.S     |
| S17    | PC_PH5126 | 1009  | 1083  | MALPY00366 | 5511  | 5437  | ctg_6871  | 467845  | 467917  |
| S18    | PC_RP1995 | 5074  | 5003  | MALPY00606 | 10035 | 9964  | ctg_6871  | 128896  | 128964  |

| snoRNA | PK Ac no          | Start        | End          | PB Ac no  | Start | End   | PG Ac no                       | Start | End  |
|--------|-------------------|--------------|--------------|-----------|-------|-------|--------------------------------|-------|------|
| S1     | PKN.002526        | 6338         | 6416         | PB_RP2870 | 12315 | 12238 | Pg_2570384.c000316052. Contig1 | 6692  | 6768 |
| S2     | PKN.002365        | 125834       | 125916       | PB_RP2232 | 3657  | 3740  | Pg_2570384.c000319723. Contig1 | 2078  | 1999 |
| S3     | PKN.002740        | 45270        | 45191        | PB_RP2363 | 860   | 780   | N.A.                           | N.A.  | N.A. |
| S4     | PKN.002161        | 1459         | 1379         | PB_RP2474 | 2419  | 2337  | N.A.                           | N.A.  | N.A. |
| S5     | PKN.002740        | 55644        | 55577        | PB_PH3411 | 758   | 825   | Pg_2570384.c000013797. Contig1 | 2075  | 2007 |
| S6     | PKN.002740        | 53816        | 53751        | N.A.      | N.A.  | N.A.  | Pg_2570384.c000013797. Contig1 | 404   | 339  |
| S7     | PKN.002740        | 54712        | 54631        | NA        | N.A.  | N.A.  | Pg_2570384.c000013797. Contig1 | 1343  | 1263 |
| S8     | PKN.002755        | 78400        | 78316        | PB_RP1551 | 4237  | 4158  | N.A.                           | N.A.  | N.A. |
| S9     | PKN.002755        | 81067        | 80995        | PB_RP1105 | 795   | 727   | N.A.                           | N.A.  | N.A. |
| S9b    | N.A.              | N.A.         | N.A.         | PB_RP1105 | 839   | 759   | Pg_2570384.c000014017. Contig1 | 970   | 902  |
| S10    | PKN.002755        | 87058        | 87121        | PB_RP3524 | 2515  | 2451  | N.A.                           | N.A.  | N.A. |
| S11    | <b>PKN.002755</b> | <b>87918</b> | <b>88001</b> | PB_RP3524 | 1715  | 1643  | N.A.                           | N.A.  | N.A. |
|        | <b>PKN.000135</b> | <b>8511</b>  | <b>8594</b>  | N.A.      | N.A.  | N.A.  | N.A.                           | N.A.  | N.A. |
| S12    | PKN.002755        | 88508        | 88586        | PB_RP3524 | 1457  | 1381  | N.A.                           | N.A.  | N.A. |
| S13    | PKN.002755        | 77587        | 77512        | PB_RP1551 | 3593  | 3518  | N.A.                           | N.A.  | N.A. |
| S14    | PKN.002755        | 183962       | 184106       | PB_RP3214 | 4921  | 5052  | N.A.                           | N.A.  | N.A. |
| S15    | PKN.002765        | 490292       | 490369       | PB_RP2926 | 5983  | 5909  | N.A.                           | N.A.  | N.A. |
| S16    | N.S               | N.S          | N.S          | N.S       | N.S   | N.S   | N.S                            | N.S   | N.S  |
| S17    | PKN.002763        | 189342       | 189414       | PB_RP0435 | 1462  | 1388  | Pg_2570384.c000320327. Contig1 | 26    | 96   |
| S18    | PKN.002488        | 29130        | 29061        | PB_RP2768 | 3268  | 3197  | N.A.                           | N.A.  | N.A. |

List of homologues of box C/D snoRNA genes (PlasmoDB Accession number) in other *Plasmodium* species: *P. chabaudi* (PC), *P. yoelii* (PY), *P. vivax* (PV), *P. knowlesi* (PK) and *P. gallinaceum* (PG). “NS” means snoRNA was absent at orthologous loci whereas “NA” stands for those snoRNA which are located in the regions lacking any sequencing information. PFS11 has two homologs in PK, which are highlighted in bold.
